# Supplementary material for: Transcriptome signatures in Helicobacter pylori-infected mucosa identifies acidic mammalian chitinase loss as a corpus atrophy marker
Source: BMC Med Genomics. 2013 Oct 11;6:41. doi: 10.1186/1755-8794-6-41 (PMC4015281; doi:10.1186/1755-8794-6-41)
Supplement: Additional file 1 — Contains supplementary materials and methods in addition to supporting data figures. [file 1755-8794-6-41-S1.pdf]

## **SUPPLEMENTARY MATERIALS AND METHODS.**

### **Patient recruitment and sample collection**

The study was approved by the human research ethics committee at University of Gothenburg, and oral and written informed consent was obtained from each volunteer before participation. Patients were selected from a consecutive cohort of patients undergoing gastroendoscopy at Sahlgrenska University Hospital, Gothenburg, during 2007 to 2009. These patients had been admitted to endoscopy due to dyspeptic symptoms, suspected occult bleeding or suspected malabsorption, and those giving written and oral consent to participate in the study were screened for *H. pylori* infection using a serology quick test (QuickVue *H. pylori* gII test, Quidel, San Diego, CA, USA) prior to endoscopy. Patients found positive in the test, and a small number of randomly selected patients found negative, were included in the study cohort. Patients had been fasted for a minimum of six hours before the examination and endoscopy was performed using a standard forward-viewing video gastroscope (Olympus GIF Q160; Olympus optical Co., Tokyo, Japan). From the included patients (n = 103), a serum sample and six biopsies from the antrum and corpus mucosa, respectively, were obtained during endoscopy. One antrum and one corpus biopsy was immediately placed in RNALater (Ambion-Invitrogen, Carlsbad, CA, USA) and stored at -70 °C for later mRNA analysis. Biopsies for protein extraction - one antrum and one corpus biopsy – were frozen and stored at -70 °C. Biopsies for *H. pylori* determination – one from antrum and one from corpus tissue – were placed in Portagerm transport medium (Biomérieux, Marcy l'Etoile, France) and later homogenized in 0.5 ml of culture media. They were thereafter cultured on Columbia ISO-A plates under microaerobic conditions (85% N<sub>2</sub>, 10% CO<sub>2</sub>, 5% O<sub>2</sub>) at 37°C. *H.*

*pylori* colonies were identified according to colony morphology and biochemical analysis (urease test). Additional parallel biopsies, one antrum and one corpus biopsy, were fixed in formaldehyde for later histologic examination by the Pathology department at Sahlgrenska University Hospital. Serum samples were analyzed using in-house IgG and IgA ELISAs <sup>1</sup>.

Patients who at subsequent examination were diagnosed with various bowel and other extragastric pathologies, including colitis or benign or malignant colorectal tumours, were excluded from the study (n = 21). The remaining patients were grouped into three groups; (1) patients without current *H. pylori* infection (Hp-; n = 37); (2) patients with current *H. pylori* infection but without corpus-predominant atrophic gastritis (Hp+; n = 34); (3) patients with current or past *H. pylori* infection and corpus-predominant atrophic gastritis (Atr; n = 7). For the purpose of this study, 6 and 8 patients were randomly selected from the Hp- and Hp+ groups, respectively. Patients were assigned to each group based on their histopathological scoring according to the Sydney system, in combination with their *H. pylori* culture results. Hp+ were culture positive in both corpus and antrum and Hp- negative in both locations. A patient was assigned to the corpus-predominant atrophy group if it had at least moderate atrophy in the corpus biopsy (score 2 or 3), concurrent with no or mild atrophy in the antrum biopsy (score 0 or 1), and positive *H. pylori* culture or serology.

### **RNA Extraction**

The RNA from stomach samples was extracted from unfractionated biopsies of antrum and corpus tissue. The tissue was disrupted using a glass mortar and pestle

and added to a QIAshredder column (Qiagen, Hilden, Germany) before RNA extraction. Total RNA was extracted using the RNEasy Mini Kit (Qiagen), according to the instructions of the manufacturer. Thereafter, the extracted RNA was checked for integrity on a 1% agarose gel and the concentration was measured using a NanoDrop<sup>®</sup> (Thermo Scientific, Wilmington, DE). The extracted RNA was kept at -70°C until further use.

**Reference:**

1. Mattsson A, Tinnert A, Hamlet A et al. Specific antibodies in sera and gastric aspirates of symptomatic and asymptomatic *Helicobacter pylori*-infected subjects. Clin Diagn Lab Immunol 1998;5:288-93.

**Table S1.** Forward and reverse primers used for qPCR analysis

| Gene   | Forward Sequence         | Reverse Sequence       |
|--------|--------------------------|------------------------|
| AMCase | AGGGCTACACTGGAGAGAACAG   | GGTAGGGAATCCAACGATGAGC |
| ATP4b  | ACAGACTCTCCACGCCTTCCTA   | GCAGGAGAACTTGGTGTGGTTG |
| PGA5   | TCTACTGCTCCAGTCTTGCCTG   | TGGACAGTGTCGTATCCGAGGA |
| HPRT1  | CATTATGCTGAGGATTTGGAAAGG | CTTGAGCACACAGAGGGCTACA |

**Supplementary Table S2.** List of genes of subgroup g4 in Fig. 2.

| ID          | Symbol   | Description                                                                | Hp-      |                        | Hp+      |                        | Atr      |                        |
|-------------|----------|----------------------------------------------------------------------------|----------|------------------------|----------|------------------------|----------|------------------------|
|             |          |                                                                            | P.Value  | Fold-diff <sup>1</sup> | P.Value  | Fold-diff <sup>1</sup> | P.Value  | Fold-diff <sup>1</sup> |
| ILMN_25328  | AVPR1A   | arginine vasopressin receptor 1A (AVPR1A)                                  | 0,054857 | 0,5530                 | 0,242918 | 0,7045                 | 0,581557 | 0,8494                 |
| ILMN_27662  | DRD5     | dopamine receptor D5 (DRD5)                                                | 1,45E-06 | 0,2920                 | 0,001097 | 0,4944                 | 0,268275 | 1,2366                 |
| ILMN_6484   | AVPR1B   | arginine vasopressin receptor 1B (AVPR1B)                                  | 0,468364 | 1,1256                 | 0,628708 | 1,0818                 | 0,461784 | 1,1276                 |
| ILMN_15738  | ADRA1D   | adrenergic, alpha-1D-, receptor (ADRA1D)                                   | 0,555523 | 0,9395                 | 0,000303 | 0,6387                 | 0,401537 | 1,0932                 |
| ILMN_11079  | ENTPD2   | ectonucleoside triphosphate diphosphohydrolase 2 (ENTPD2), transcript v    | 0,004957 | 1,8981                 | 0,415351 | 1,1852                 | 0,429204 | 1,1792                 |
| ILMN_11182  | FGA      | fibrinogen alpha chain (FGA), transcript variant alpha                     | 6,17E-06 | 0,0502                 | 7,08E-05 | 0,0846                 | 0,416088 | 0,6588                 |
| ILMN_1134   | P2RX1    | purinergic receptor P2X, ligand-gated ion channel, 1 (P2RX1)               | 0,35449  | 0,8364                 | 0,537124 | 0,8884                 | 0,304966 | 0,8201                 |
| ILMN_138180 | VWF      | von Willebrand factor (VWF)                                                | 0,267451 | 0,6099                 | 0,329466 | 0,6483                 | 0,457317 | 0,7198                 |
| ILMN_13882  | FGB      | fibrinogen beta chain (FGB)                                                | 1,64E-08 | 0,0319                 | 0,004679 | 0,2883                 | 0,22246  | 0,6095                 |
| ILMN_139223 | GP1BB    | glycoprotein Ib (platelet), beta polypeptide (GP1BB)                       | 0,867059 | 1,0930                 | 0,816218 | 1,1314                 | 0,427756 | 1,5284                 |
| ILMN_16715  | PF4      | platelet factor 4 (chemokine (C-X-C motif) ligand 4) (PF4)                 | 0,138203 | 0,7467                 | 0,942573 | 1,0139                 | 0,728323 | 0,9354                 |
| ILMN_18231  | F2       | coagulation factor II (thrombin) (F2)                                      | 0,024547 | 0,6874                 | 0,276823 | 0,8412                 | 0,336034 | 0,8585                 |
| ILMN_21183  | TREML1   | triggering receptor expressed on myeloid cells-like 1 (TREML1)             | 0,14594  | 0,6907                 | 0,084696 | 0,6418                 | 0,959355 | 0,9874                 |
| ILMN_22394  | PIK3CB   | phosphoinositide-3-kinase, catalytic, beta polypeptide (PIK3CB)            | 0,329401 | 1,1863                 | 0,06223  | 1,4004                 | 0,454974 | 1,1391                 |
| ILMN_22820  | CD40     | CD40 antigen (TNF receptor superfamily member 5) (CD40), transcript va     | 0,270052 | 1,3505                 | 0,987767 | 1,0041                 | 0,558679 | 0,8541                 |
| ILMN_23651  | IL11     | interleukin 11 (IL11)                                                      | 0,980529 | 1,0108                 | 0,940765 | 0,9678                 | 0,858889 | 1,0816                 |
| ILMN_25813  | FGG      | fibrinogen gamma chain (FGG), transcript variant gamma-A                   | 9,22E-06 | 0,2759                 | 0,00003  | 0,3087                 | 0,750132 | 1,0746                 |
| ILMN_25961  | F2R      | coagulation factor II (thrombin) receptor (F2R)                            | 0,671378 | 1,1778                 | 0,93685  | 1,0310                 | 0,440249 | 0,7414                 |
| ILMN_26128  | COL3A1   | collagen, type III, alpha 1 (Ehlers-Danlos syndrome type IV, autosomal do  | 0,73114  | 1,1473                 | 0,596411 | 0,8088                 | 0,20616  | 0,5977                 |
| ILMN_2685   | CD40LG   | CD40 ligand (CD40LG)                                                       | 0,656798 | 0,9171                 | 0,236691 | 1,2633                 | 0,117141 | 0,7309                 |
| ILMN_27584  | GP1BA    | glycoprotein Ib (platelet), alpha polypeptide (GP1BA)                      | 0,021047 | 0,7197                 | 0,352433 | 0,8820                 | 0,891233 | 1,0184                 |
| ILMN_28364  | SAA1     | serum amyloid A1 (SAA1), transcript variant 2                              | 0,876349 | 1,1236                 | 0,368132 | 0,5064                 | 0,263166 | 0,4272                 |
| ILMN_3251   | P2RY12   | purinergic receptor P2Y, G-protein coupled, 12 (P2RY12), transcript varian | 0,27246  | 0,8166                 | 0,124491 | 1,3332                 | 0,630984 | 0,9161                 |
| ILMN_3991   | ADAMTS13 | ADAM metalloproteinase with thrombospondin type 1 motif, 13 (ADAMTS        | 0,138632 | 0,8269                 | 0,654588 | 1,0577                 | 0,381997 | 1,1166                 |
| ILMN_4248   | GP6      | glycoprotein VI (platelet) (GP6)                                           | 0,105332 | 1,2401                 | 0,093647 | 0,7999                 | 0,078764 | 0,7906                 |
| ILMN_4337   | BLOC1S3  | biogenesis of lysosome-related organelles complex-1, subunit 3 (BLOC1S3    | 0,652836 | 0,9080                 | 0,063396 | 1,5134                 | 0,020624 | 0,5892                 |
| ILMN_4382   | GNA13    | guanine nucleotide binding protein (G protein), alpha 13 (GNA13)           | 0,00445  | 1,6581                 | 0,036638 | 1,4257                 | 0,657216 | 1,0742                 |
| ILMN_4441   | PLSCR1   | phospholipid scramblase 1 (PLSCR1)                                         | 0,052171 | 1,7148                 | 0,617928 | 1,1420                 | 0,938222 | 1,0208                 |
| ILMN_4953   | CD9      | CD9 molecule (CD9)                                                         | 0,094629 | 1,8398                 | 0,033341 | 2,2096                 | 0,391226 | 1,3567                 |

|            |        |                                                                   |          |        |          |        |          |        |
|------------|--------|-------------------------------------------------------------------|----------|--------|----------|--------|----------|--------|
| ILMN_6469  | IL6    | interleukin 6 (interferon, beta 2) (IL6)                          | 0,88145  | 1,0785 | 0,406883 | 1,5273 | 0,968924 | 1,0199 |
| ILMN_7767  | ENTPD1 | ectonucleoside triphosphate diphosphohydrolase 1 (ENTPD1)         | 0,461236 | 1,2858 | 0,484036 | 1,2695 | 0,250302 | 0,6731 |
| ILMN_19861 | FGL2   | fibrinogen-like 2 (FGL2)                                          | 0,349577 | 1,4546 | 0,488205 | 1,3184 | 0,191604 | 0,5895 |
| ILMN_2104  | FGL1   | fibrinogen-like 1 (FGL1), transcript variant 4                    | 0,472727 | 0,7731 | 0,303602 | 0,6899 | 0,464682 | 0,7694 |
| ILMN_4516  | FN1    | fibronectin 1 (FN1), transcript variant 7                         | 0,733262 | 1,0624 | 0,796159 | 1,0469 | 0,823642 | 1,0404 |
| ILMN_4882  | THBS1  | thrombospondin 1 (THBS1)                                          | 0,586926 | 1,3717 | 0,260838 | 1,9380 | 0,680814 | 1,2699 |
| ILMN_1289  | PLAT   | plasminogen activator, tissue (PLAT), transcript variant 1        | 0,891756 | 0,9538 | 0,440778 | 0,7634 | 0,500744 | 0,7903 |
| ILMN_22727 | NR2F2  | nuclear receptor subfamily 2, group F, member 2 (NR2F2)           | 2,76E-05 | 0,4202 | 0,000193 | 0,4800 | 0,906327 | 0,9807 |
| ILMN_28694 | CDH2   | cadherin 2, type 1, N-cadherin (neuronal) (CDH2)                  | 2,21E-06 | 0,0621 | 0,000276 | 0,1517 | 0,908044 | 0,9505 |
| ILMN_28724 | EDN1   | endothelin 1 (EDN1)                                               | 0,001092 | 0,2748 | 0,002234 | 0,3046 | 0,48763  | 0,7851 |
| ILMN_7827  | SELP   | selectin P (granule membrane protein 140kDa, antigen CD62) (SELP) | 0,52352  | 1,2814 | 0,775165 | 1,1169 | 0,216732 | 0,6147 |

<sup>1</sup> Average fold-difference between antrum and corpus samples of the patients of each group. Fold-diff < 1 means a lower expression in corpus.

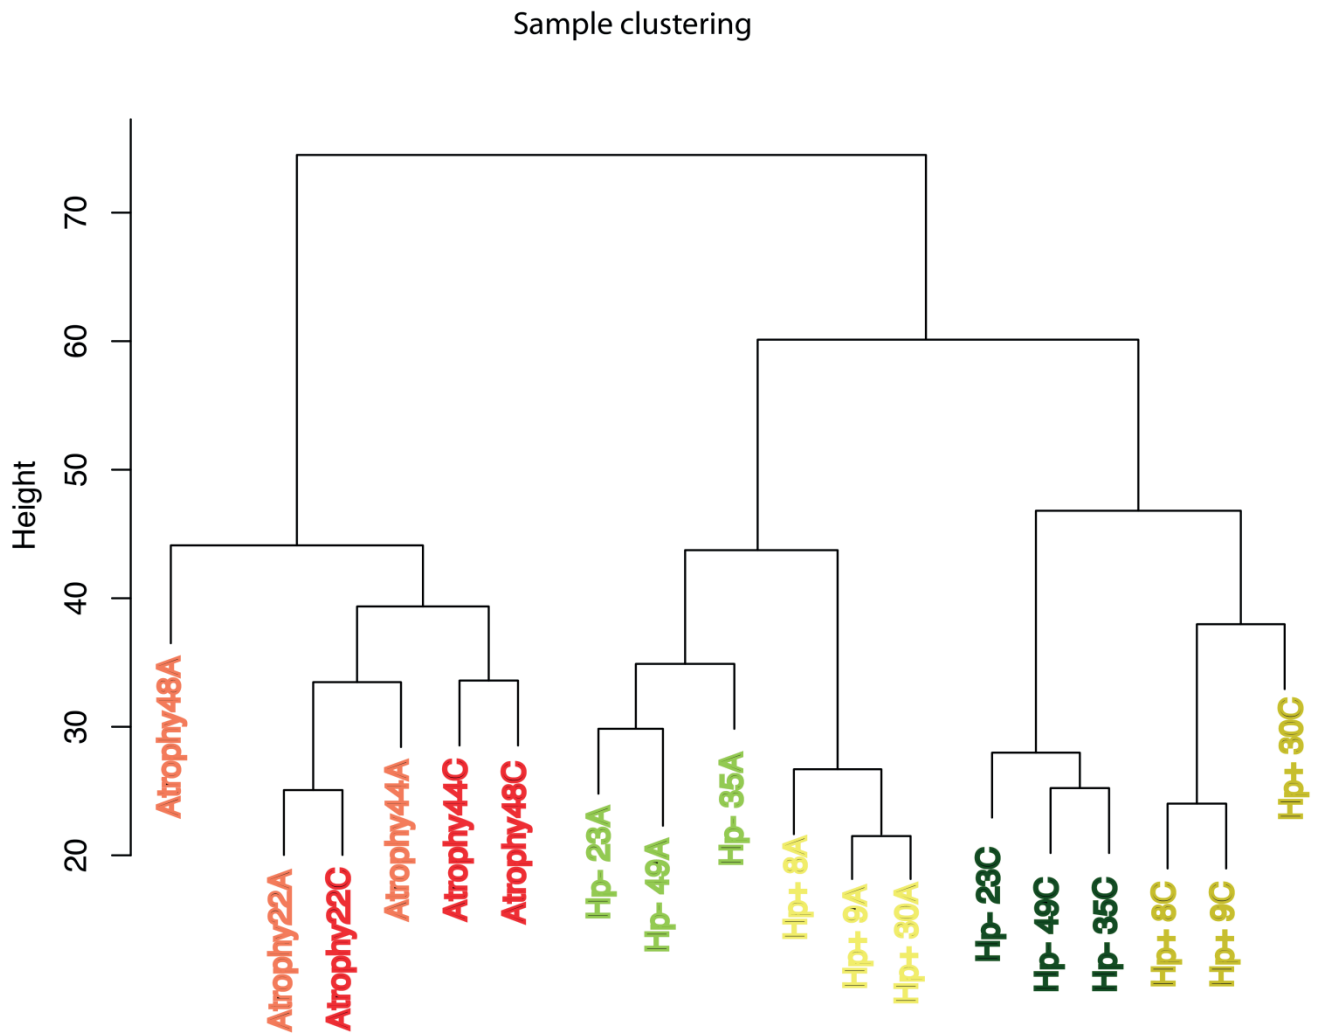

**Supplementary Fig S1.**

The microarray data from antrum and corpus samples of all the study subjects was subjected to unsupervised hierarchical clustering. Corpus biopsies are indicated by "C", antrum biopsies by "A". The numbers indicate patient IDs. "Hp-" is *H. pylori*-uninfected subjects, "Hp+" is *H. pylori* infected subjects, and "Atrophy" is patients with corpus atrophy.

### **A. Corpus**

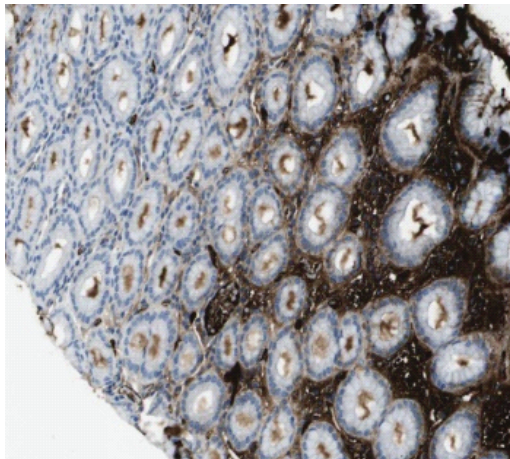

### **B. Antrum**

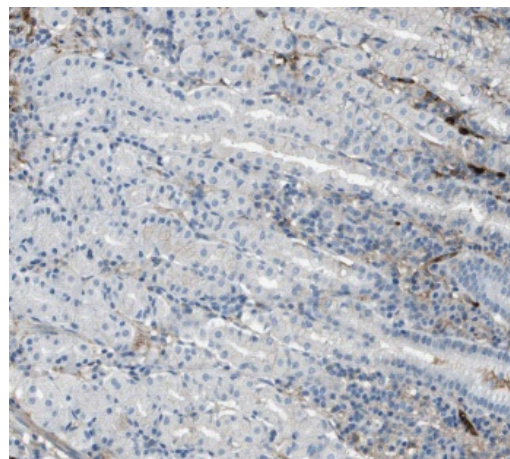

#### **Supplementary Fig S2.**

Images from Human Protein Atlas - [www.proteinatlas.org](http://www.proteinatlas.org). Corpus (A) and Antrum (B) mucosa from healthy individuals stained with antibodies to the alpha chain of fibrinogen (FGA), using the antibody CAB016776.

## Retinoic acid receptor signaling pathway

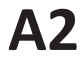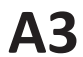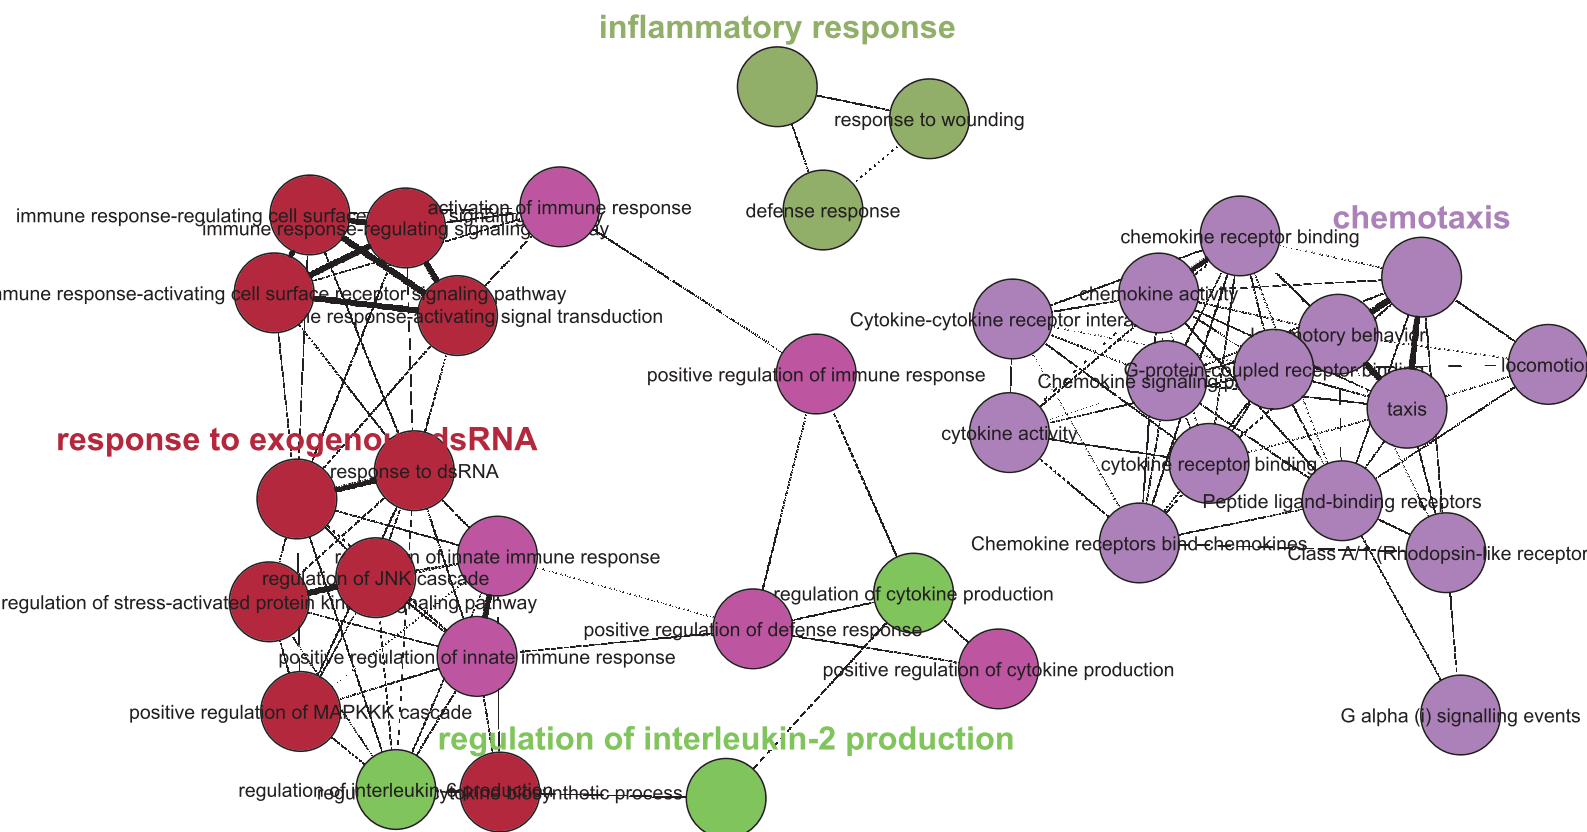

# C1

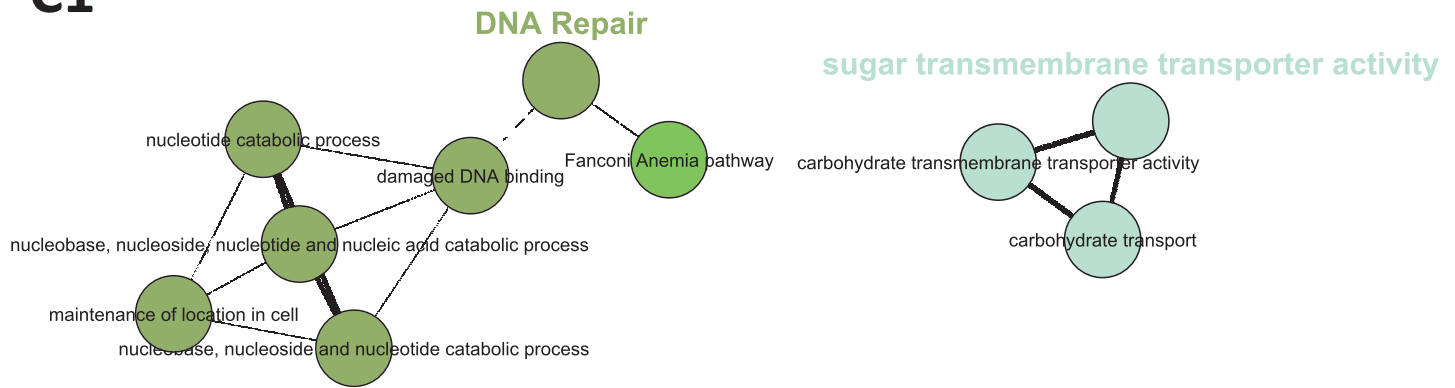

## C2.1

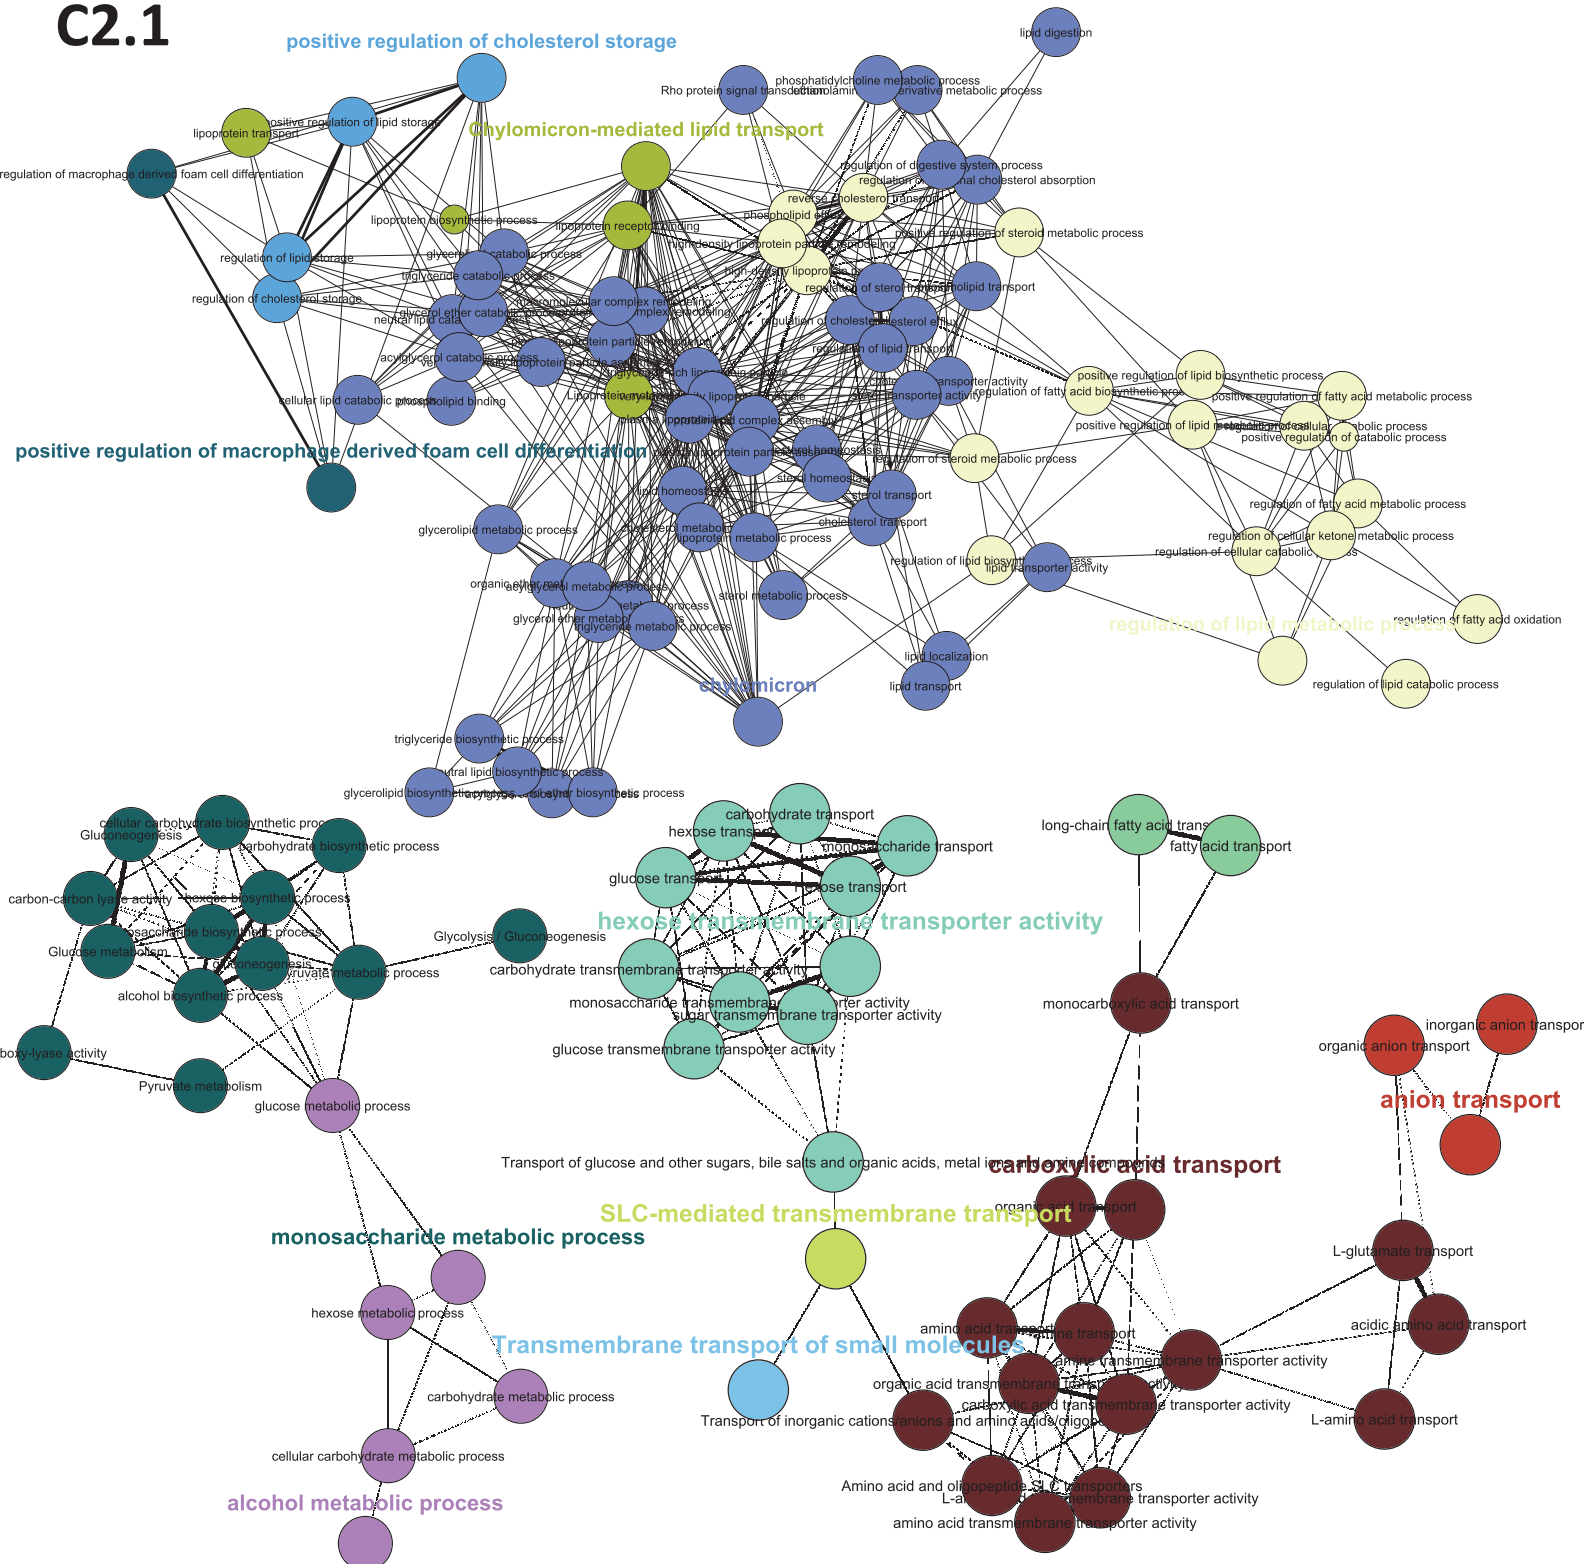

## C2.2

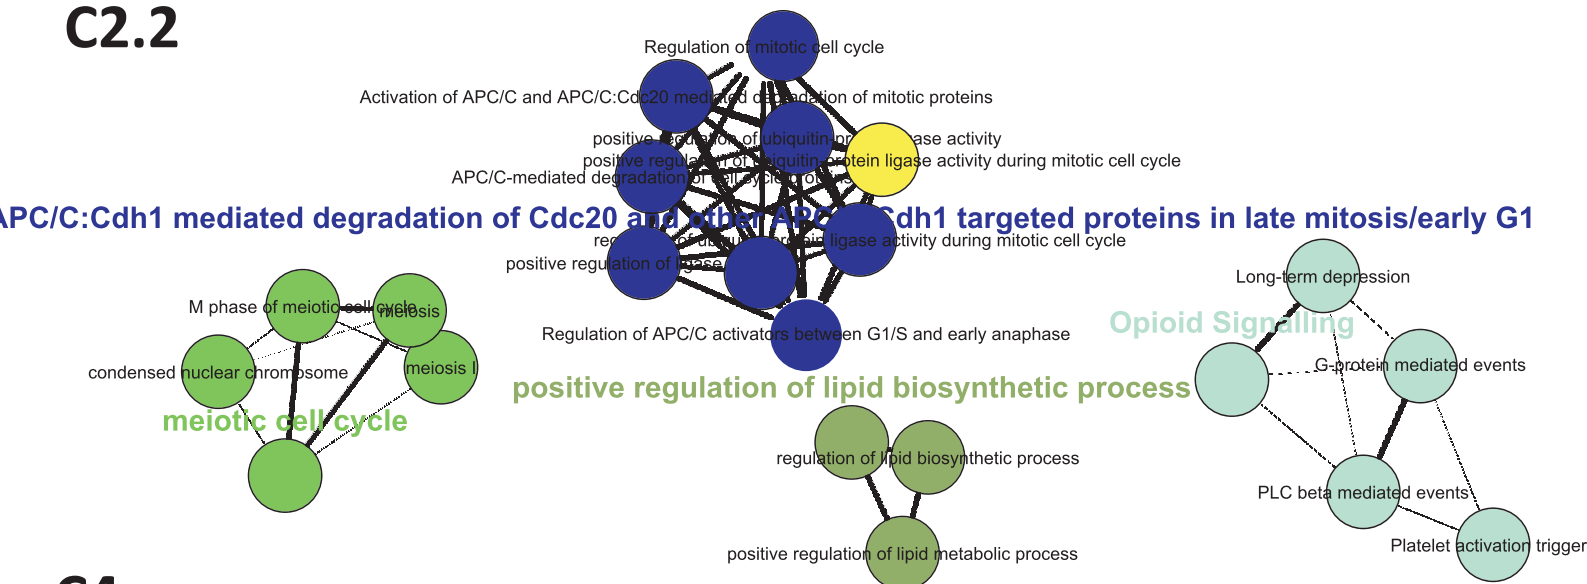

## C4

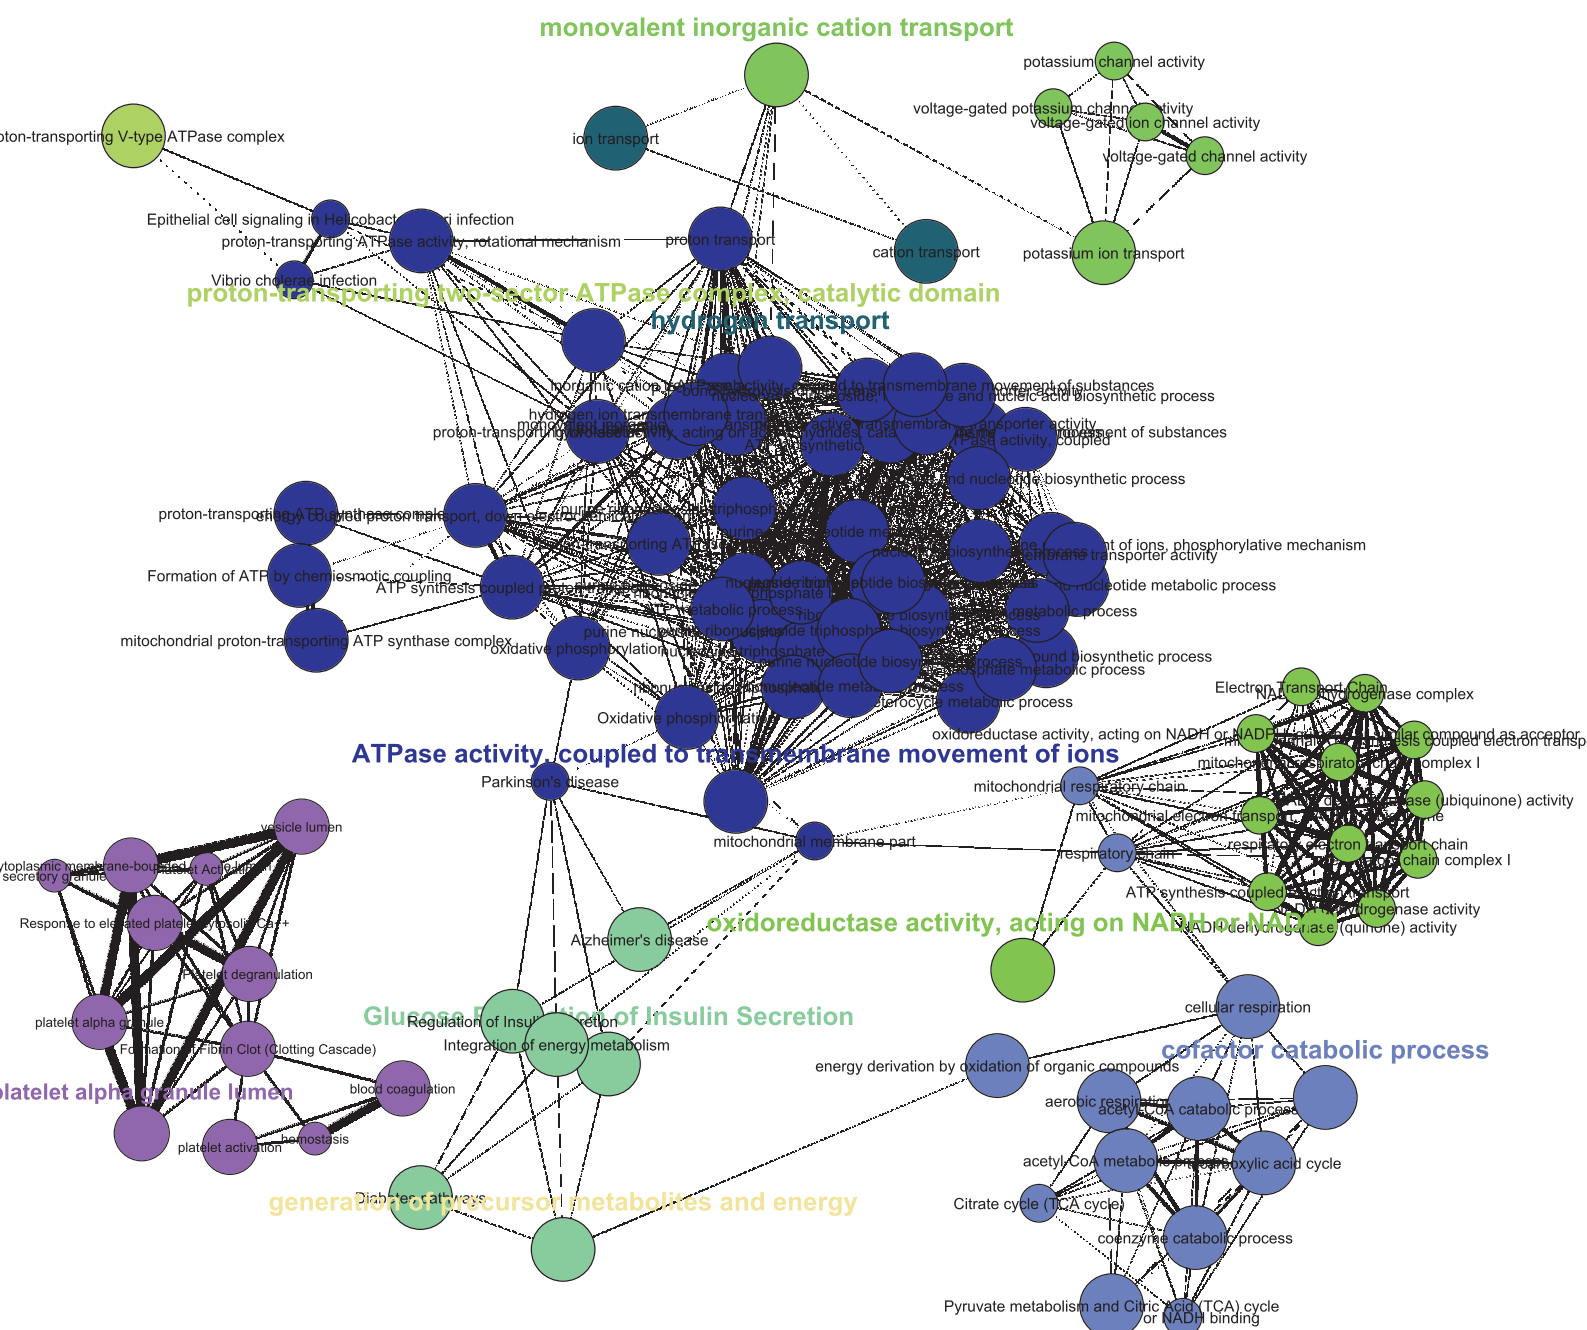

**Supplementary Figure S3 (above).**

This is an enlargement of the "bubbles"-part of Figure 3 in the main manuscript. The figure shows the significantly enriched ontologies associated to each cluster (C1-C4; A1-A3). Related ontologies are depicted by the same color, and are connected by lines. The names of the most highly significant ontologies are shown in larger font size.

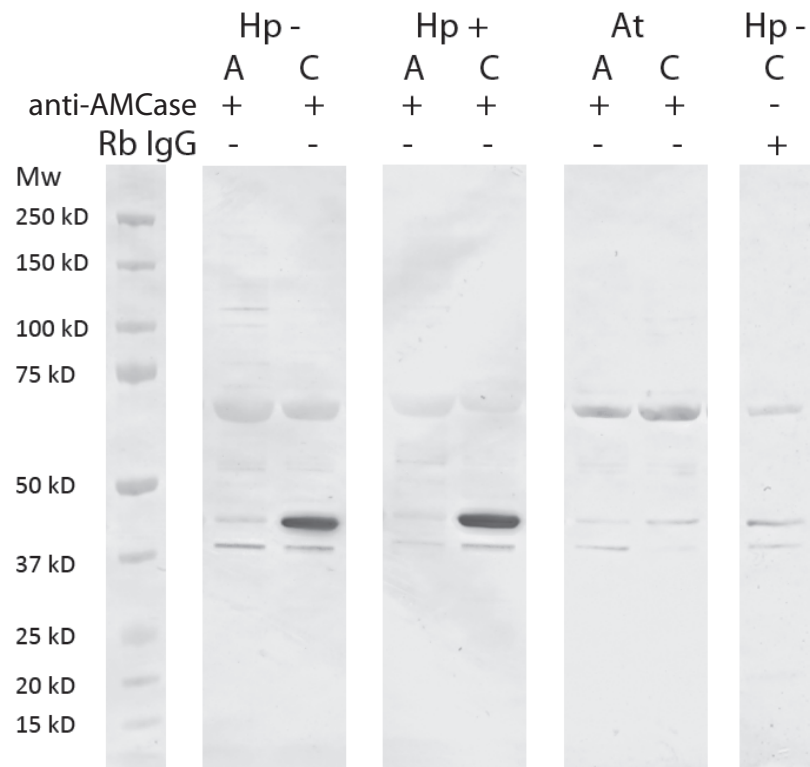

**Supplementary Figure S4.**

AMCase protein levels analysed with Western Blot in Antrum (A) and Corpus (C) samples of patients from Hp-, Hp+ and Atr groups. Blotting was performed using a polyclonal rabbit anti-AMCase antibody or rabbit IgG as negative control. A representative blotting image with one patient from each group is shown. The AMCase protein has a theoretical molecular weight of 49.9 kDa.

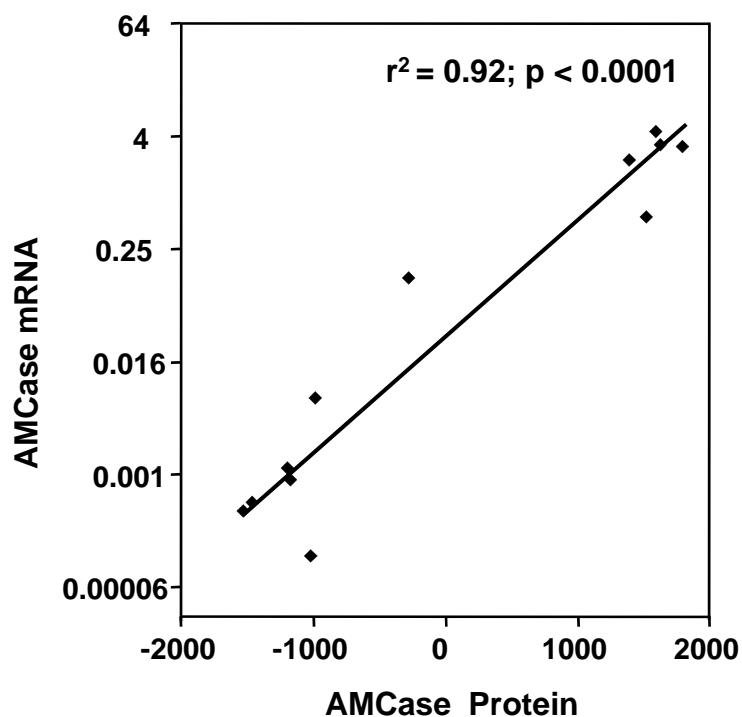

**Supplementary Figure S5.**

AMCase levels in antrum or corpus tissue of stomach samples, analyzed by RT-PCR (mRNA) and Western blot (protein). Biopsies analyzed for mRNA and protein content were collected at close distance from each other in the stomach mucosa. All samples in which both mRNA and protein were analysed in the same patient are included in the graph (n = 12 corpus/antrum samples from 6 patients, see Table S1 for details of patient analyses).
